# Supplementary material for: Association Between Distance to an Abortion Facility and Abortion or Pregnancy Outcome Among a Prospective Cohort of People Seeking Abortion Online
Source: PubMed Central journal article supplement (PMC9107030; doi:10.1001/jamanetworkopen.2022.12065), 2022-05-13
Supplement: jamanetwopen-e2212065-s001.pdf [file jamanetwopen-e2212065-s001.pdf]

## Supplemental Online Content

Pleasants EA, Cartwright AF, Upadhyay UD. Association between distance to an abortion facility and abortion or pregnancy outcome among a prospective cohort of people seeking abortion online. *JAMA Netw Open*. 2022;5(5):e2212065. doi:10.1001/jamanetworkopen.2022.12065

**eAppendix.** Google Ads Abortion Access Study Survey Questions Providing Data Used for Analysis

**eTable.** Adjusted Odds Ratios for Association Between Selected Distance-Related Barriers to Abortion Access and Distances to Abortion

This supplemental material has been provided by the authors to give readers additional information about their work.

**eAppendix.** Google Ads Abortion Access Study Survey Questions Providing Data Used for Analysis

1. Are you pregnant right now?
  - Yes
  - No
  - Not sure
  
2. What happened with your most recent pregnancy? (As a reminder, your responses are completely confidential.)
  - I had an abortion procedure done by a clinician in a clinic or doctor's office
  - I took abortion pills that I got from a clinic, doctor or nurse
  - I took abortion pills that I got from the internet or another source
  - Miscarriage – **END:** Thank you for participating in the first survey. You do not qualify to participate in this follow-up survey.
  - Other (please explain): \_\_\_\_\_ - **END:** Thank you for participating in the first survey. You do not qualify to participate in this follow-up survey.

**eTable.** Adjusted Odds Ratios for Association Between Selected Distance-Related Barriers to Abortion Access and Distances to Abortion

| Distance-related barrier (OR)                                    | <5 miles<br>(n=233) | 5-24 miles<br>(n=382) | p-value      | 25-49 miles<br>(n=85) | p-value          | ≥50 miles<br>(n=165) | p-value          |
|------------------------------------------------------------------|---------------------|-----------------------|--------------|-----------------------|------------------|----------------------|------------------|
| Any distance-related barriers reported                           | (ref)               | 0.98 (0.60,1.59)      | 0.925        | 4.04* (1.20,13.64)    | <b>0.024</b>     | 2.07* (1.00,4.27)    | <b>0.049</b>     |
| The distance I had to travel made it hard                        | (ref)               | 1.65* (1.12,2.43)     | <b>0.011</b> | 5.98*** (3.46,10.34)  | <b>&lt;0.001</b> | 8.45*** (5.32,13.41) | <b>&lt;0.001</b> |
| I had to make multiple trips to the facility                     | (ref)               | 1.40 (0.98,2.00)      | 0.061        | 1.75* (1.04,2.94)     | <b>0.036</b>     | 1.98** (1.29,3.03)   | <b>0.002</b>     |
| I didn't know where to get an abortion                           | (ref)               | 1.33 (0.84,2.10)      | 0.229        | 2.19* (1.19,4.05)     | <b>0.012</b>     | 2.28** (1.37,3.80)   | <b>0.001</b>     |
| I had to arrange for transport to the facility                   | (ref)               | 1.23 (0.86,1.74)      | 0.253        | 2.52*** (1.51,4.21)   | <b>&lt;0.001</b> | 2.12*** (1.39,3.23)  | <b>&lt;0.001</b> |
| I had to gather money for travel expenses                        | (ref)               | 1.07 (0.75,1.51)      | 0.720        | 2.64** (1.42,4.93)    | <b>0.002</b>     | 1.80* (1.12,2.89)    | <b>0.015</b>     |
| I had to keep the abortion a secret                              | (ref)               | 1.18 (0.85,1.64)      | 0.324        | 1.99* (1.18,3.36)     | <b>0.010</b>     | 1.62* (1.08,2.44)    | <b>0.021</b>     |
| I had to arrange for childcare or care for another family member | (ref)               | 0.86 (0.59,1.25)      | 0.468        | 1.71* (1.01,2.89)     | <b>0.044</b>     | 1.99** (1.30,3.04)   | <b>0.001</b>     |
| I had to get time off work/school                                | (ref)               | 1.20 (0.86,1.67)      | 0.276        | 1.36 (0.83,2.24)      | 0.224            | 1.25 (0.84,1.87)     | 0.272            |

\*p<0.05; \*\*p<0.01, \*\*\*p<0.001.

Notes: Models adjusted for state clustering as a random effect.
